# Supplementary material for: Modulating the active phase in perovskite LaCoO3 with B-site doping of Cu for efficient methanol reforming to produce hydrogen
Source: Royal Society of Chemistry journal article supplement (doi:10.1039/d3ce01268a), 2024-01-01
Supplement: d3ce01268a1.pdf [file d3ce01268a1.pdf]

# Electronic Supporting Information

## Modulating the active phase in perovskite LaCoO<sub>3</sub> with B-site doping of Cu for efficient methanol reforming to produce hydrogen

Weiling Zhang,<sup>ab</sup> Peiwei Han,<sup>ab</sup> Juan Li,<sup>b</sup> Zizhen Niu,<sup>ab</sup> Guowei Wang,<sup>ab</sup> Nan Wang,<sup>b</sup> Xiangnan Li,<sup>b</sup> Lyumeng Ye<sup>\*c</sup> and Xinjun Li<sup>\*ab</sup>

<sup>a</sup> School of Energy Science and Engineering, University of Science and Technology of China.

<sup>b</sup> Guangzhou Institute of Energy Conversion, Chinese Academy of Sciences.

<sup>c</sup> South China Institute of Environmental Sciences, the Ministry of Ecology and Environment of PRC.

\* Corresponding author

Email: [lixinjun@ustc.edu.cn](mailto:lixinjun@ustc.edu.cn)

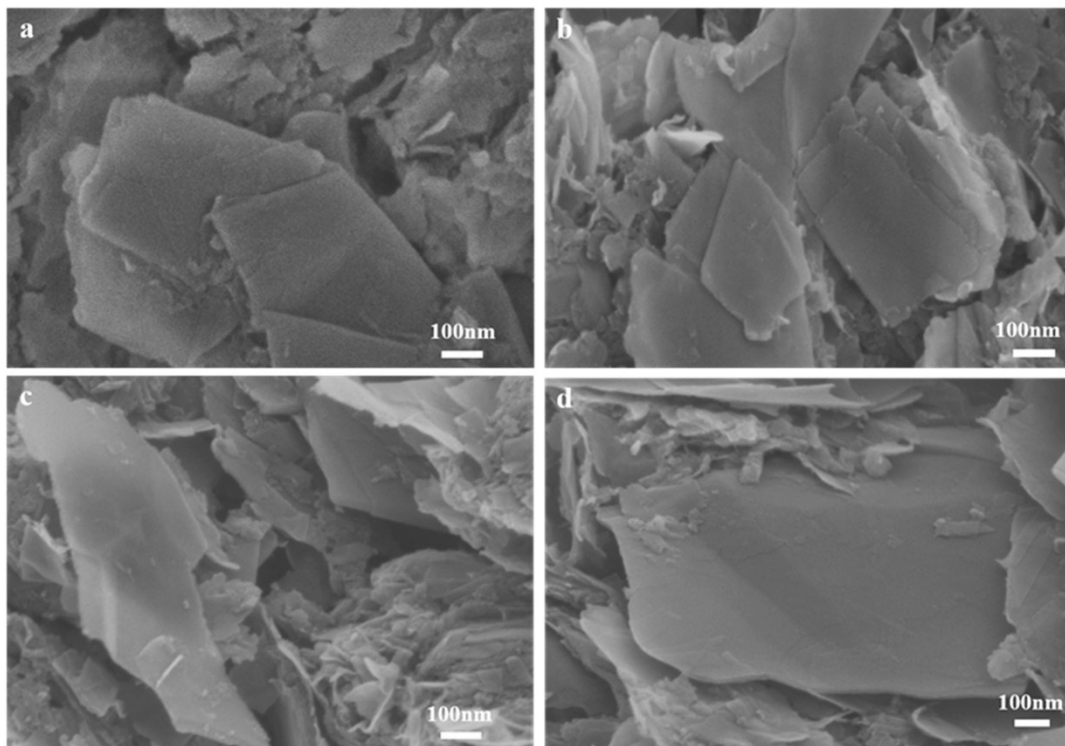

Fig.S1 SEM images of (a)LaCoO<sub>3</sub> (b)LaCo<sub>0.97</sub>Cu<sub>0.03</sub>O<sub>3</sub> (c)LaCo<sub>0.94</sub>Cu<sub>0.06</sub>O<sub>3</sub> (d)LaCo<sub>0.88</sub>Cu<sub>0.12</sub>O<sub>3</sub>

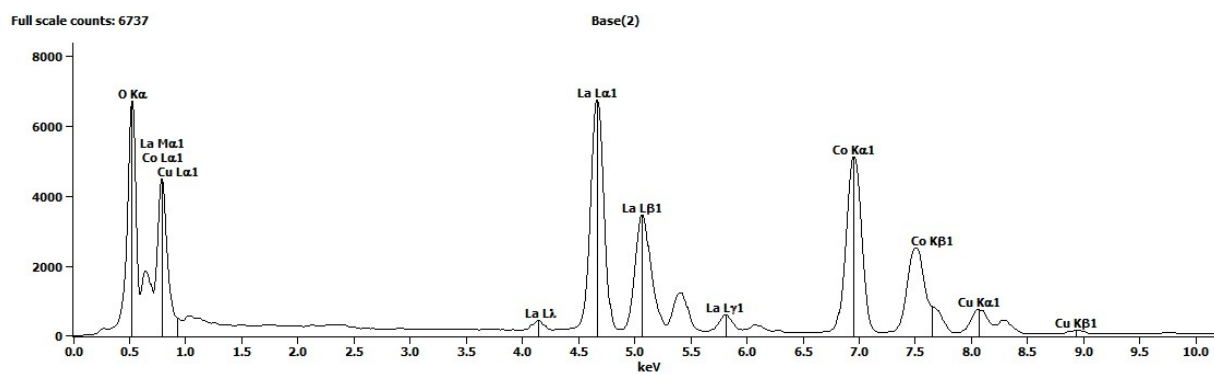

Fig.S2 EDS spectral analysis of LaCo<sub>0.97</sub>Cu<sub>0.03</sub>O<sub>3</sub>-300 catalyst.

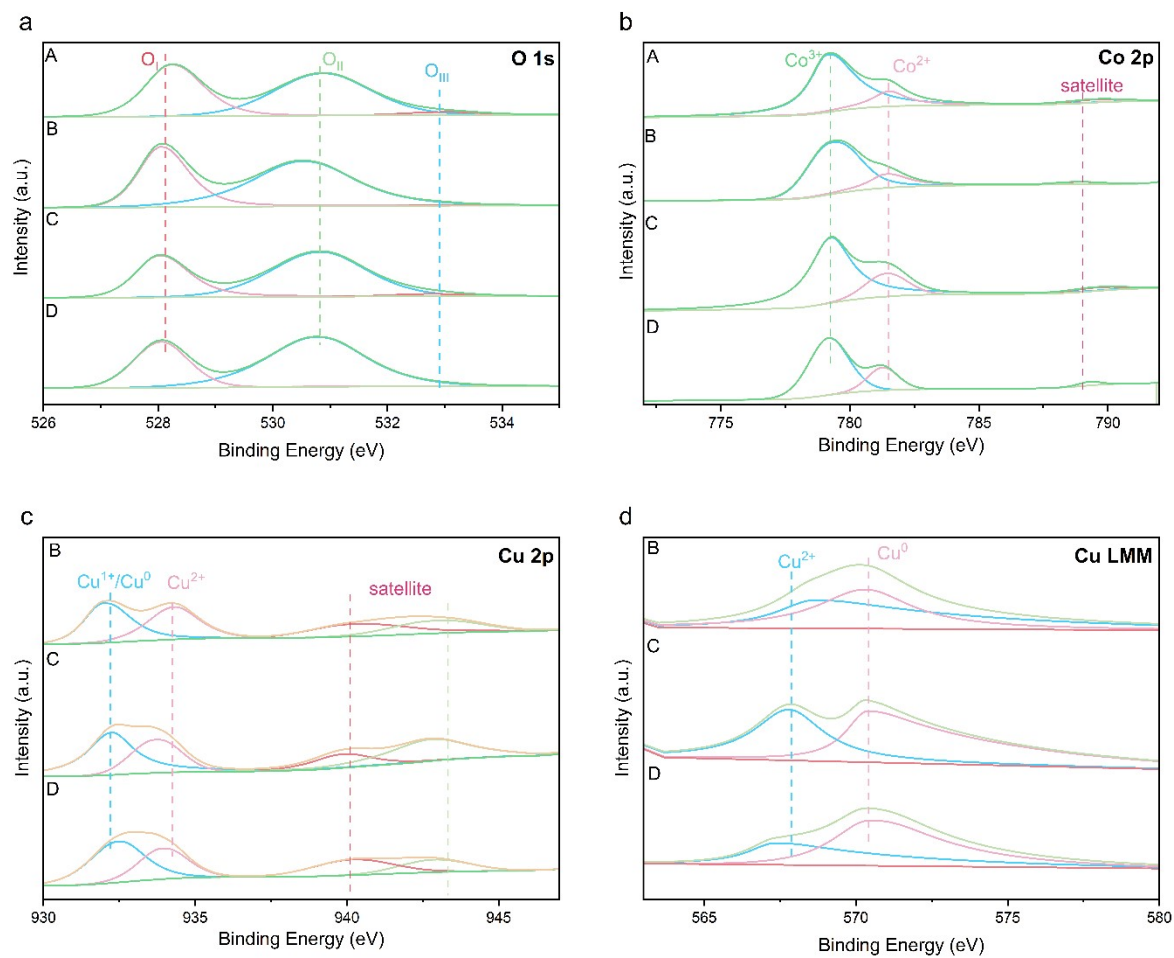

Fig.S3 (a) O 1s, (b) Co 2p, (c) Cu 2p, and (d)Cu LMM XPS spectra of  $\text{LaCo}_{1-x}\text{Cu}_x\text{O}_3$ -300 catalysts (A:  $x=0$ , B:  $x=0.03$ , C: $x=0.06$ , D: $x=0.12$ ).

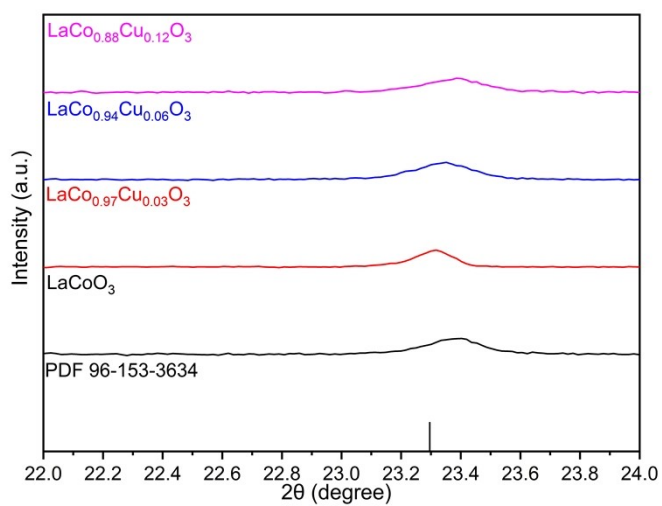

Fig.S4 XRD pattern of  $\text{LaCo}_{1-x}\text{Cu}_x\text{O}_3$  catalysts.

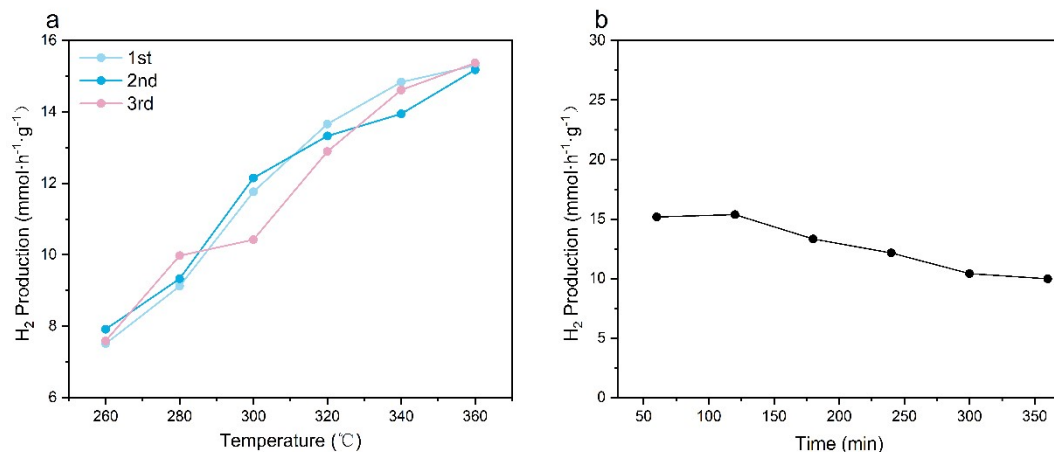

Fig.S5 The stability and cyclic experiments of LaCo<sub>0.97</sub>Cu<sub>0.03</sub>O<sub>3</sub>-300 catalysts.

Table S1 EDS results of LaCo<sub>0.97</sub>Cu<sub>0.03</sub>O<sub>3</sub>-300

| <i>Element Line</i> | <i>Weight %</i> | <i>Weight % Error</i> | <i>Norm. Wt.%</i> | <i>Norm. Wt.% Err</i> | <i>Atom %</i> | <i>Atom % Error</i> |
|---------------------|-----------------|-----------------------|-------------------|-----------------------|---------------|---------------------|
| <b>OK</b>           | 15.10           | ± 0.13                | 15.10             | ± 0.13                | 53.26         | ± 0.45              |
| <b>Co K</b>         | 20.71           | ± 0.13                | 20.71             | ± 0.13                | 19.83         | ± 0.12              |
| <b>Cu K</b>         | 1.74            | ± 0.11                | 1.74              | ± 0.11                | 1.54          | ± 0.10              |
| <b>La L</b>         | 62.45           | ± 0.31                | 62.45             | ± 0.31                | 25.37         | ± 0.13              |
| <b>Total</b>        | 100.00          |                       | 100.00            |                       | 100.00        |                     |

Table S2 Chemical state distribution of elements on catalyst surface (Atomic %)

| Samples                                                     | Cu                   |                      | O                  |                     |                      | Co                   |                      |
|-------------------------------------------------------------|----------------------|----------------------|--------------------|---------------------|----------------------|----------------------|----------------------|
|                                                             | Cu <sup>1+</sup> (%) | Cu <sup>2+</sup> (%) | O <sub>I</sub> (%) | O <sub>II</sub> (%) | O <sub>III</sub> (%) | Co <sup>3+</sup> (%) | Co <sup>2+</sup> (%) |
| LaCoO <sub>3</sub> -300                                     | --                   | --                   | 43.29              | 53.06               | 3.66                 | 82.02                | 17.98                |
| LaCo <sub>0.97</sub> Cu <sub>0.03</sub> O <sub>3</sub> -300 | 36.59                | 63.41                | 40.2               | 59.11               | 0.69                 | 79.64                | 20.36                |
| LaCo <sub>0.94</sub> Cu <sub>0.06</sub> O <sub>3</sub> -300 | 39.18                | 60.82                | 38.1               | 59.24               | 2.65                 | 78.97                | 21.03                |
| LaCo <sub>0.88</sub> Cu <sub>0.12</sub> O <sub>3</sub> -300 | 59.41                | 40.59                | 35.76              | 64.07               | 0.16                 | 77.14                | 22.86                |
